# Supplementary material
Source: Research Square preprint supplement (doi:10.21203/rs.3.rs-9997074/v1)
Supplement: Supplementary file 1 [file b47b0d1a41319fd12b1d175f.pdf]

## Informed Consent and Child Assent Forms

Arabic / English Bilingual Version

Generative AI in Egyptian children's everyday lives

These forms are provided as templates with participant identifiers removed, in accordance with the journal's ethical guidelines and the study's de-identification protocol (SI Methods File S3). Signed originals are held securely by the research institution and are available to editors on request subject to applicable privacy regulations.

### PART A — Parental Informed Consent Form

نموذج موافقة ولي الأمر المستنيرة | Parental Informed Consent Form

#### Study Information | معلومات الدراسة

| English                                                                                                                                                             | العربية                                                                                                                                                          |
|---------------------------------------------------------------------------------------------------------------------------------------------------------------------|------------------------------------------------------------------------------------------------------------------------------------------------------------------|
| Study title: Generative AI in Egyptian children's everyday lives: Patterns of use, parental mediation, and cultural-religious negotiation in an Arab-Muslim context | عنوان الدراسة: الذكاء الاصطناعي التوليدي في حياة الأطفال المصريين اليومية: أنماط الاستخدام، والوساطة الوالدية، والتفاوض الثقافي-الديني في السياق العربي الإسلامي |
| Institution: Faculty of Graduate Childhood Studies, Ain Shams University, Cairo, Egypt                                                                              | المؤسسة: كلية الدراسات العليا للطفولة، جامعة عين شمس، القاهرة، مصر                                                                                               |
| Ethics approval reference: [REDACTED — provided in cover letter]                                                                                                    | مرجع الموافقة الأخلاقية: [محبوب — مذكور في خطاب التغطية]                                                                                                         |

#### Purpose of the Study | الغرض من الدراسة

|                                                                                                                                                                                                                                                                                                                                                                                                     |                                                                                                                                                                                                                                                                                                                                                                                                                              |
|-----------------------------------------------------------------------------------------------------------------------------------------------------------------------------------------------------------------------------------------------------------------------------------------------------------------------------------------------------------------------------------------------------|------------------------------------------------------------------------------------------------------------------------------------------------------------------------------------------------------------------------------------------------------------------------------------------------------------------------------------------------------------------------------------------------------------------------------|
| This study explores how Egyptian children aged 7–12 use generative AI tools (such as ChatGPT) in their daily lives, how parents monitor and mediate this use, and how families negotiate AI use in relation to Islamic values and cultural practices. Participation involves one semi-structured interview with you (the parent) and one with your child, each lasting approximately 45–60 minutes. | تستكشف هذه الدراسة كيفية استخدام الأطفال المصريين في الفئة العمرية 7–12 عامًا لأدوات الذكاء الاصطناعي التوليدي (مثل ChatGPT) في حياتهم اليومية، وكيفية مراقبة الآباء لهذا الاستخدام (ChatGPT) والوساطة فيه، وكيفية تفاوض الأسر بشأن استخدام الذكاء الاصطناعي في ضوء القيم الإسلامية والممارسات الثقافية. تتضمن المشاركة إجراء مقابلة شبه منظمة معك (ولي الأمر) ومقابلة مع طفلك، تستغرق كل منهما ما بين 45 و60 دقيقة تقريبًا. |
|-----------------------------------------------------------------------------------------------------------------------------------------------------------------------------------------------------------------------------------------------------------------------------------------------------------------------------------------------------------------------------------------------------|------------------------------------------------------------------------------------------------------------------------------------------------------------------------------------------------------------------------------------------------------------------------------------------------------------------------------------------------------------------------------------------------------------------------------|

#### Voluntary Participation and Withdrawal | المشاركة الطوعية والانسحاب

|                                                                                                                                                                                                                                                                                |                                                                                                                                                                       |
|--------------------------------------------------------------------------------------------------------------------------------------------------------------------------------------------------------------------------------------------------------------------------------|-----------------------------------------------------------------------------------------------------------------------------------------------------------------------|
| Participation is entirely voluntary. You and your child may withdraw at any time without giving a reason and without any negative consequences. You may request that data from your interviews be deleted at any point up to the submission of the manuscript for publication. | المشاركة طوعية تمامًا. يحق لك ولطفلك الانسحاب في أي وقت دون إبداء أي سبب ودون أي تبعات سلبية. يمكنك طلب حذف بيانات مقابلاتك في أي وقت حتى تاريخ تقديم المخطوطة للنشر. |
|--------------------------------------------------------------------------------------------------------------------------------------------------------------------------------------------------------------------------------------------------------------------------------|-----------------------------------------------------------------------------------------------------------------------------------------------------------------------|

## Confidentiality and Anonymisation | السرية وإخفاء الهوية

All interview data will be fully anonymised before any analysis or publication. Names, school names, neighbourhood identifiers and all other potentially identifying details will be replaced with participant codes. No individual will be identifiable in any published output. Data will be stored securely and accessible only to the research team.

سيتم إخفاء هوية جميع بيانات المقابلات بالكامل قبل أي تحليل أو نشر. سيتم استبدال الأسماء وأسماء المدارس والمعرفات الجغرافية وجميع التفاصيل الأخرى التي قد تكشف الهوية برموز المشارك. لن يكون أي فرد قابلاً للتعرف عليه في أي مخرجات منشورة. سيتم تخزين البيانات بشكل آمن ولن يتمكن من الوصول إليها سوى فريق البحث.

## Consent Declaration | إقرار الموافقة

I confirm that I have read and understood the information above. I agree to participate in this study and give permission for my child to participate. I understand that participation is voluntary and that I may withdraw at any time.

أؤكد أنني قرأت المعلومات الواردة أعلاه وفهمتها. أوافق على المشاركة في هذه الدراسة وأمنح الإذن لطفلي بالمشاركة. أفهم أن المشاركة طوعية وأنه يحق لي الانسحاب في أي وقت.

Parent/Guardian name: \_\_\_\_\_

اسم ولي الأمر: \_\_\_\_\_

Signature: \_\_\_\_\_

التوقيع: \_\_\_\_\_

Date: \_\_\_\_\_

التاريخ: \_\_\_\_\_

## PART B — Child Assent Form (Ages 7–12)

### Child Assent Form | نموذج موافقة الطفل

| English                                                                                                                                                                                                                                                                                                                                                                       | العربية                                                                                                                                                                                                                                                                                               |
|-------------------------------------------------------------------------------------------------------------------------------------------------------------------------------------------------------------------------------------------------------------------------------------------------------------------------------------------------------------------------------|-------------------------------------------------------------------------------------------------------------------------------------------------------------------------------------------------------------------------------------------------------------------------------------------------------|
| <p>Hi! A researcher would like to talk with you about how you use AI tools like ChatGPT. You do not have to talk to us if you do not want to. If you say yes, we will ask you some questions. There are no right or wrong answers — we just want to know what you think. We will not use your real name. Your mum or dad has said it is okay, but it is also your choice.</p> | <p>مرحبًا! يرغب باحث في التحدث معك حول كيفية استخدامك لأدوات لا يجب عليك التحدث معنا إذا ChatGPT الذكاء الاصطناعي مثل كنت لا تريد ذلك. إذا وافقت، سنطرح عليك بعض الأسئلة. لا توجد إجابات صحيحة أو خاطئة — نريد فقط معرفة رأيك. لن نستخدم اسمك الحقيقي. وافق والداك، لكن القرار في النهاية لك أنت.</p> |
| <p>Do you agree to take part? <input type="checkbox"/> Yes, I agree <input type="checkbox"/> No, I do not want to</p>                                                                                                                                                                                                                                                         | <p>هل توافق على المشاركة؟ <input type="checkbox"/> نعم، أوافق <input type="checkbox"/> لا، لا أريد</p>                                                                                                                                                                                                |
| <p>Child's name (printed): _____ Date: _____</p>                                                                                                                                                                                                                                                                                                                              | <p>اسم الطفل (بالأحرف الكبيرة): _____ التاريخ: _____</p>                                                                                                                                                                                                                                              |

Supplementary Data File S2 — Informed Consent and Child Assent Forms (Bilingual Arabic/English). These are template versions with participant identifiers removed. Signed originals are retained by the research institution.
