# Supplementary material
Source: Research Square preprint supplement (doi:10.21203/rs.3.rs-9997074/v1)
Supplement: Supplementary file 3 [file dfe93a20a1128420cd9b0bfe.pdf]

**SUPPLEMENTARY TABLE S1**  
**Content Analysis Coding Instrument**

*From pandemic to greenwashing: comparative media framing of risk and crisis  
in the Tokyo 2020 and Paris 2024 Olympic Games*

**SECTION A — Article Identification**

|                                     |                                                                                                                                                                                                         |
|-------------------------------------|---------------------------------------------------------------------------------------------------------------------------------------------------------------------------------------------------------|
| <b>Coder ID</b>                     |                                                                                                                                                                                                         |
| <b>Article ID (sequential)</b>      |                                                                                                                                                                                                         |
| <b>Date of coding</b>               |                                                                                                                                                                                                         |
| <b>Games edition</b>                | <input type="checkbox"/> Tokyo 2020 <input type="checkbox"/> Paris 2024                                                                                                                                 |
| <b>Outlet</b>                       | <input type="checkbox"/> BBC <input type="checkbox"/> Le Monde <input type="checkbox"/> Asahi Shimbun <input type="checkbox"/> Al Jazeera <input type="checkbox"/> Reuters <input type="checkbox"/> NYT |
| <b>Article date (DD/MM/YYYY)</b>    |                                                                                                                                                                                                         |
| <b>Headline</b>                     |                                                                                                                                                                                                         |
| <b>Article word count (approx.)</b> |                                                                                                                                                                                                         |
| <b>Article type</b>                 | <input type="checkbox"/> News report <input type="checkbox"/> Analysis <input type="checkbox"/> Opinion/editorial <input type="checkbox"/> Feature <input type="checkbox"/> Other:<br>_____             |

**SECTION B — Coding Variables**

**V1: Primary Frame Type (circle one code)**

|   |                          |  |
|---|--------------------------|--|
| 1 | Health risk              |  |
| 2 | Institutional legitimacy |  |
| 3 | Athlete welfare          |  |
| 4 | Political                |  |
| 5 | Economic                 |  |
| 6 | Human interest           |  |
| 7 | Environmental            |  |
| 8 | Other/unclear            |  |

*Notes / justification:*

|  |
|--|
|  |
|--|

**V2: Dominant Tone (circle one code)**

|   |          |  |
|---|----------|--|
| 1 | Positive |  |
| 2 | Negative |  |
| 3 | Neutral  |  |

**V3: Primary Source Type (circle one code)**

|   |                        |  |
|---|------------------------|--|
| 1 | Official/institutional |  |
| 2 | Scientific/expert      |  |
| 3 | Activist/civil society |  |
| 4 | Athlete                |  |
| 5 | Public/social media    |  |
| 6 | Journalist/commentator |  |
| 7 | Other/not applicable   |  |

**V4: Attribution of Crisis Responsibility (circle one code)**

|   |                    |  |
|---|--------------------|--|
| 1 | IOC                |  |
| 2 | Host government    |  |
| 3 | External forces    |  |
| 4 | Corporate sponsors |  |
| 5 | Shared/multiple    |  |
| 6 | Unattributed       |  |

**V5: Treatment Recommendation Frame (circle one code)**

|   |                           |  |
|---|---------------------------|--|
| 1 | Cancellation/postponement |  |
| 2 | Reform                    |  |
| 3 | Business as usual         |  |
| 4 | Cautious optimism         |  |
| 5 | Unspecified               |  |

**SECTION C — Coder Notes**

Use this space to record any uncertainty, edge cases, or observations relevant to this article:

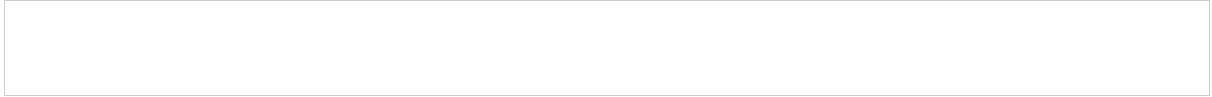

---

*Supplementary Table S1 — Content Analysis Coding Instrument. Companion to Supplementary Note S1 (Codebook).*
